# Supplementary material for: Radiomic signature accurately predicts the risk of metastatic dissemination in late-stage non-small cell lung cancer
Source: bioRxiv or medRxiv preprint supplement (doi:10.1101/2023.01.31.23285230), 2023-02-01
Supplement: Supplementary file [file media-1.pdf]

# Supplementary appendix: Radiomic signature accurately predicts the risk of metastatic dissemination in late-stage non-small cell lung cancer

Agata Małgorzata Wilk, Emilia Kozłowska, Damian Borys, Andrea D'Amico, Krzysztof Fujarewicz<sup>1</sup>, Izabela Gorczevska, Iwona Dębosz-Suwińska, Rafał Suwiński, Jarosław Śmieja, Andrzej Swierniak

## Supplementary Tables

**Supplementary Table 1.** Summary of the correlation-based feature filtering.

| Feature class | All features | Features kept after correlation filtering |
|---------------|--------------|-------------------------------------------|
| First order   | 18           | 6                                         |
| GLCM          | 22           | 13                                        |
| GLDM          | 14           | 8                                         |
| GLRLM         | 16           | 10                                        |
| GLSZM         | 16           | 15                                        |
| NGTDM         | 5            | 4                                         |
| Shape         | 14           | 9                                         |
| Total         | 105          | 65                                        |

**Supplementary Table 2.** Potential of the data to predict EFS (clinical variables). Fisher's exact test was applied for p-value estimation.

|              |             | EFS short<br>(N = 66) | EFS long<br>(N = 49) | MFS short<br>(N = 25) | MFS long<br>(N = 49) | p-value<br>(binary<br>EFS) | p-value<br>(binary<br>MFS) |
|--------------|-------------|-----------------------|----------------------|-----------------------|----------------------|----------------------------|----------------------------|
| Sex          | MALE        | 45                    | 38                   | 17                    | 38                   | 0.299                      | 0.408                      |
|              | FEMALE      | 21                    | 11                   | 8                     | 11                   |                            |                            |
| HP           | SQUAMOUS    | 49                    | 28                   | 16                    | 28                   | 0.071                      | 0.624                      |
|              | NONSQUAMOUS | 17                    | 21                   | 9                     | 21                   |                            |                            |
| Location     | LEFT        | 38                    | 27                   | 14                    | 27                   | 0.850                      | 1                          |
|              | RIGHT       | 28                    | 22                   | 11                    | 22                   |                            |                            |
| T            | T12         | 24                    | 17                   | 8                     | 17                   | 1                          | 1                          |
|              | T34         | 42                    | 32                   | 17                    | 32                   |                            |                            |
| N            | N01         | 12                    | 13                   | 5                     | 13                   | 0.361                      | 0.582                      |
|              | N23         | 54                    | 36                   | 20                    | 36                   |                            |                            |
| Zubrod score | ZERO        | 17                    | 17                   | 6                     | 17                   | 0.311                      | 0.431                      |
|              | NONZERO     | 49                    | 32                   | 19                    | 32                   |                            |                            |

**Supplementary Table 3.** Potential of the data to predict MFS and EFS. For binary MFS and EFS, the Mann-Whitney U test was used. For the continuous MFS log-rank test. Variables statistically significant against continuous MFS are highlighted in bold.

| Feature                                           | p-value (MFS) | p-value (EFS) | p-value (continuous MFS) |
|---------------------------------------------------|---------------|---------------|--------------------------|
| original_glcm_InverseVariance                     | 0.066         | 0.401         | <0.001                   |
| original_glszm_SizeZoneNonUniformityNormalized    | 0.016         | 0.022         | 0.003                    |
| original_glszm_SmallAreaLowGrayLevelEmphasis      | 0.025         | 0.593         | 0.003                    |
| original_glrlm_LongRunLowGrayLevelEmphasis        | 0.071         | 0.555         | 0.004                    |
| original_shape_SurfaceVolumeRatio                 | 0.061         | 0.115         | 0.005                    |
| original_glszm_GrayLevelNonUniformity             | 0.023         | 0.047         | 0.006                    |
| original_glrlm_RunLengthNonUniformity             | 0.011         | 0.073         | 0.007                    |
| original_glszm_HighGrayLevelZoneEmphasis          | 0.236         | 0.398         | 0.008                    |
| original_ngtdm_Busyness                           | 0.020         | 0.127         | 0.009                    |
| original_glszm_GrayLevelNonUniformityNormalized   | 0.079         | 0.189         | 0.011                    |
| original_glcm_Autocorrelation                     | 0.388         | 0.903         | 0.014                    |
| original_glcm_JointAverage                        | 0.306         | 0.989         | 0.014                    |
| original_glrlm_HighGrayLevelRunEmphasis           | 0.357         | 0.917         | 0.014                    |
| original_glszm_SizeZoneNonUniformity              | 0.086         | 0.100         | 0.018                    |
| original_gldm_DependenceNonUniformity             | 0.037         | 0.108         | 0.019                    |
| original_shape_MajorAxisLength                    | 0.087         | 0.243         | 0.022                    |
| original_shape_LeastAxisLength                    | 0.135         | 0.229         | 0.023                    |
| original_glrlm_ShortRunHighGrayLevelEmphasis      | 0.495         | 0.771         | 0.024                    |
| original_shape_Maximum2DDiameterColumn            | 0.031         | 0.061         | 0.025                    |
| original_ngtdm_Strength                           | 0.039         | 0.083         | 0.027                    |
| original_shape_Maximum3DDiameter                  | 0.084         | 0.229         | 0.028                    |
| original_glrlm_GrayLevelNonUniformity             | 0.053         | 0.185         | 0.031                    |
| original_glszm_LowGrayLevelZoneEmphasis           | 0.056         | 0.338         | 0.031                    |
| original_gldm_GrayLevelNonUniformity              | 0.095         | 0.241         | 0.031                    |
| original_glszm_LargeAreaLowGrayLevelEmphasis      | 0.135         | 0.433         | 0.033                    |
| original_firstorder_Range                         | 0.011         | 0.023         | 0.034                    |
| original_shape_SurfaceArea                        | 0.067         | 0.158         | 0.037                    |
| original_firstorder_Maximum                       | 0.009         | 0.026         | 0.037                    |
| original_glszm_SmallAreaEmphasis                  | 0.328         | 0.953         | 0.038                    |
| age                                               | 0.161         | 0.255         | 0.038                    |
| original_gldm_HighGrayLevelEmphasis               | 0.369         | 0.930         | 0.039                    |
| original_shape_Sphericity                         | 0.446         | 0.621         | 0.042                    |
| original_ngtdm_Coarseness                         | 0.052         | 0.136         | 0.042                    |
| original_glszm_ZoneEntropy                        | 0.027         | 0.019         | 0.046                    |
| original_shape_Maximum2DDiameterSlice             | 0.084         | 0.246         | 0.051                    |
| original_glcm_SumEntropy                          | 0.110         | 0.109         | 0.058                    |
| original_firstorder_MeanAbsoluteDeviation         | 0.006         | 0.015         | 0.063                    |
| original_firstorder_Variance                      | 0.007         | 0.016         | 0.063                    |
| original_glcm_DifferenceVariance                  | 0.495         | 0.771         | 0.063                    |
| original_gldm_LargeDependenceLowGrayLevelEmphasis | 0.236         | 0.819         | 0.065                    |
| original_shape_MeshVolume                         | 0.061         | 0.162         | 0.066                    |
| original_shape_VoxelVolume                        | 0.061         | 0.162         | 0.066                    |
| original_firstorder_90Percentile                  | 0.007         | 0.017         | 0.075                    |

|                                                    |       |       |       |
|----------------------------------------------------|-------|-------|-------|
| original_firstorder_InterquartileRange             | 0.002 | 0.009 | 0.077 |
| original_firstorder_RobustMeanAbsoluteDeviation    | 0.004 | 0.012 | 0.077 |
| original_glrlm_LongRunHighGrayLevelEmphasis        | 0.255 | 0.070 | 0.080 |
| original_firstorder_RootMeanSquared                | 0.010 | 0.020 | 0.090 |
| original_glcm_DifferenceEntropy                    | 0.759 | 0.828 | 0.106 |
| original_firstorder_Uniformity                     | 0.154 | 0.047 | 0.118 |
| original_firstorder_Energy                         | 0.007 | 0.012 | 0.120 |
| original_firstorder_TotalEnergy                    | 0.007 | 0.012 | 0.120 |
| original_glcm_Correlation                          | 0.311 | 0.547 | 0.122 |
| original_glszm_LargeAreaEmphasis                   | 0.113 | 0.346 | 0.122 |
| original_glszm_ZoneVariance                        | 0.121 | 0.343 | 0.122 |
| original_firstorder_Kurtosis                       | 0.057 | 0.023 | 0.127 |
| original_firstorder_Mean                           | 0.014 | 0.022 | 0.128 |
| original_shape_Maximum2DDiameterRow                | 0.140 | 0.335 | 0.132 |
| original_glszm_LargeAreaHighGrayLevelEmphasis      | 0.138 | 0.210 | 0.140 |
| original_gldm_DependenceEntropy                    | 0.210 | 0.430 | 0.148 |
| original_glcm_Idmn                                 | 0.785 | 0.953 | 0.189 |
| original_shape_MinorAxisLength                     | 0.026 | 0.081 | 0.195 |
| original_gldm_SmallDependenceHighGrayLevelEmphasis | 0.510 | 0.673 | 0.195 |
| original_glcm_Contrast                             | 0.716 | 0.881 | 0.213 |
| original_glcm_MaximumProbability                   | 0.236 | 0.097 | 0.229 |
| original_glcm_ClusterTendency                      | 0.171 | 0.481 | 0.256 |
| original_glrlm_RunEntropy                          | 0.345 | 0.236 | 0.265 |
| original_firstorder_10Percentile                   | 0.105 | 0.063 | 0.272 |
| original_glcm_Imc2                                 | 0.540 | 0.841 | 0.274 |
| original_firstorder_Entropy                        | 0.194 | 0.063 | 0.295 |
| original_glrlm_ShortRunLowGrayLevelEmphasis        | 0.295 | 0.682 | 0.301 |
| original_glszm_ZonePercentage                      | 0.227 | 0.450 | 0.310 |
| original_ngtdm_Contrast                            | 0.829 | 0.989 | 0.314 |
| original_gldm_SmallDependenceEmphasis              | 0.919 | 0.719 | 0.347 |
| original_glcm_JointEntropy                         | 0.265 | 0.071 | 0.348 |
| original_glrlm_RunVariance                         | 0.179 | 0.355 | 0.348 |
| original_glrlm_LongRunEmphasis                     | 0.236 | 0.457 | 0.352 |
| original_glcm_JointEnergy                          | 0.28  | 0.073 | 0.375 |
| original_glrlm_ShortRunEmphasis                    | 0.642 | 0.890 | 0.382 |
| original_glcm_DifferenceAverage                    | 0.964 | 0.894 | 0.391 |
| original_glrlm_LowGrayLevelRunEmphasis             | 0.265 | 0.784 | 0.391 |
| original_firstorder_Median                         | 0.021 | 0.021 | 0.400 |
| original_glcm_ClusterShade                         | 0.525 | 0.745 | 0.424 |
| original_gldm_LowGrayLevelEmphasis                 | 0.250 | 0.736 | 0.448 |
| original_ngtdm_Complexity                          | 0.594 | 0.749 | 0.452 |
| original_glcm_Imc1                                 | 0.650 | 0.678 | 0.472 |
| original_glcm_Idn                                  | 0.919 | 0.823 | 0.473 |
| original_glrlm_GrayLevelNonUniformityNormalized    | 0.141 | 0.049 | 0.475 |
| original_glrlm_RunLengthNonUniformityNormalized    | 0.609 | 0.948 | 0.489 |
| original_shape_Flatness                            | 0.751 | 0.819 | 0.494 |
| original_gldm_SmallDependenceLowGrayLevelEmphasis  | 0.510 | 0.574 | 0.513 |
| original_shape_Elongation                          | 0.400 | 0.417 | 0.542 |

|                                                    |       |       |       |
|----------------------------------------------------|-------|-------|-------|
| original_gldm_LargeDependenceHighGrayLevelEmphasis | 0.642 | 0.379 | 0.549 |
| original_glrlm_RunPercentage                       | 0.937 | 0.841 | 0.572 |
| original_glcm_Id                                   | 0.625 | 0.741 | 0.637 |
| original_glszm_GrayLevelVariance                   | 0.357 | 0.762 | 0.661 |
| original_firstorder_Skewness                       | 0.838 | 0.536 | 0.721 |
| original_glcm_ClusterProminence                    | 0.547 | 0.971 | 0.740 |
| original_glszm_SmallAreaHighGrayLevelEmphasis      | 0.525 | 0.814 | 0.740 |
| original_glcm_SumSquares                           | 0.357 | 0.485 | 0.747 |
| original_gldm_LargeDependenceEmphasis              | 1.000 | 0.823 | 0.774 |
| original_glcm_Idm                                  | 0.777 | 0.784 | 0.795 |
| original_firstorder_Minimum                        | 0.407 | 0.452 | 0.858 |
| original_gldm_DependenceNonUniformityNormalized    | 0.982 | 0.665 | 0.910 |
| original_gldm_GrayLevelVariance                    | 0.301 | 0.346 | 0.926 |
| original_glrlm_GrayLevelVariance                   | 0.400 | 0.510 | 0.983 |
| original_gldm_DependenceVariance                   | 0.601 | 0.780 | 0.983 |

**Supplementary Table 4.** Log-rank test for continuous MFS.

|              |             | N = 115 | p-value<br>(continuous MFS) |
|--------------|-------------|---------|-----------------------------|
| Sex          | MALE        | 83      | 0.714                       |
|              | FEMALE      | 32      |                             |
| HP           | SQUAMOUS    | 77      | 0.835                       |
|              | NONSQUAMOUS | 38      |                             |
| Location     | LEFT        | 65      | 0.536                       |
|              | RIGHT       | 50      |                             |
| T            | T12         | 41      | 0.917                       |
|              | T34         | 74      |                             |
| N            | N01         | 25      | 0.656                       |
|              | N23         | 90      |                             |
| Zubrod score | ZERO        | 34      | 0.818                       |
|              | NONZERO     | 81      |                             |

## Supplementary Figures

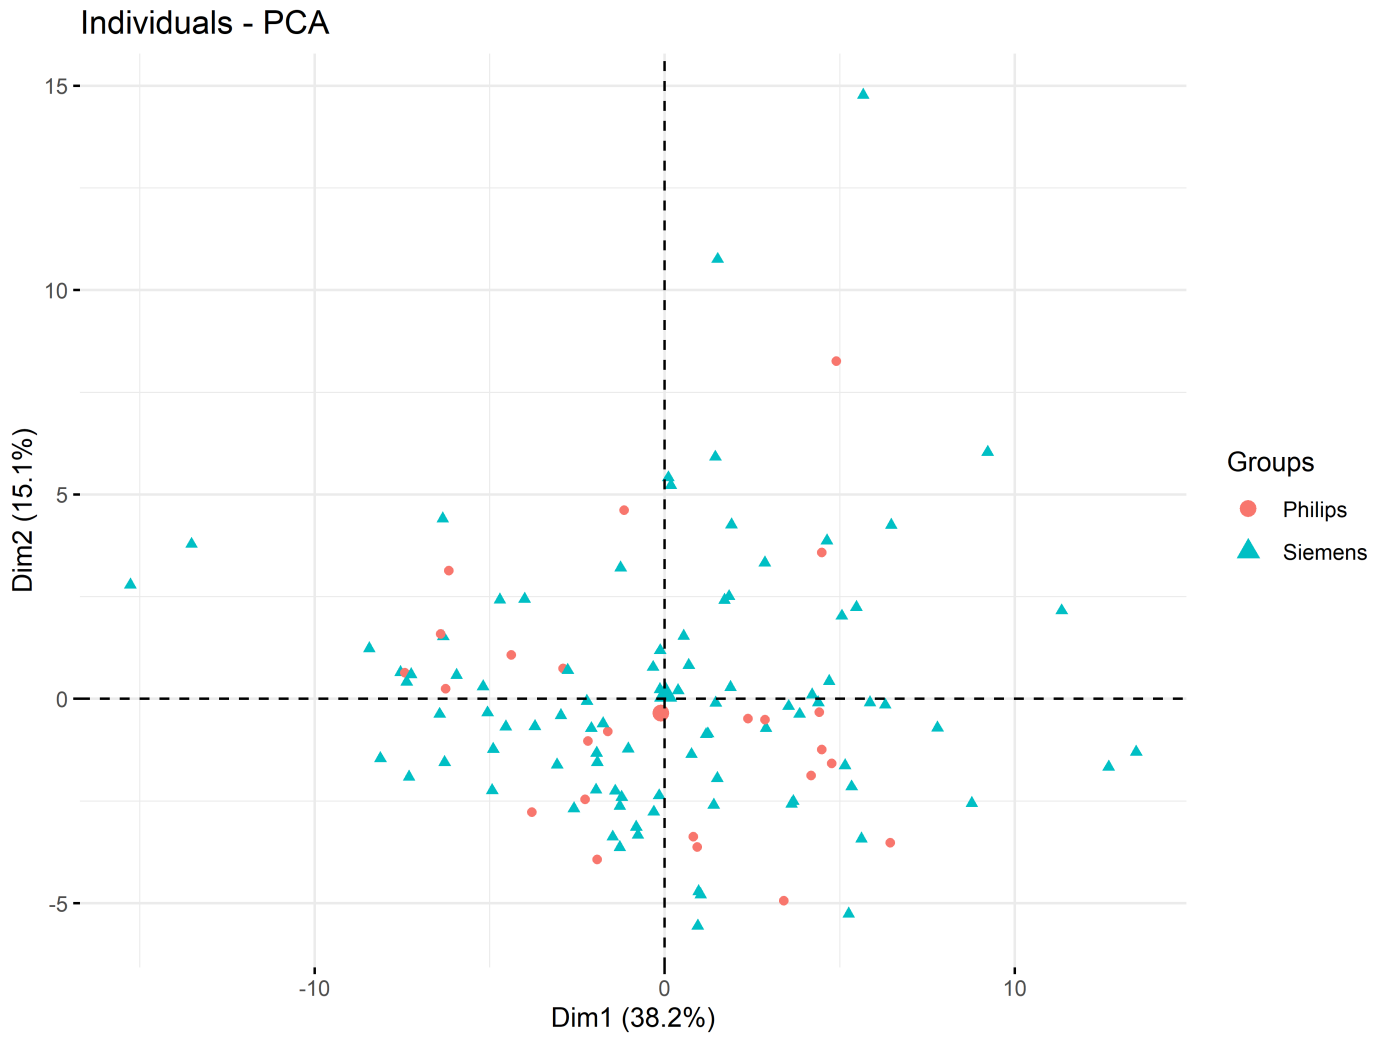

**SF 1.** Principal component analysis of the radiomic features (after correlation filtering). Colors correspond to the PET/CT scanner. There is no visible grouping of samples according to the scanner.

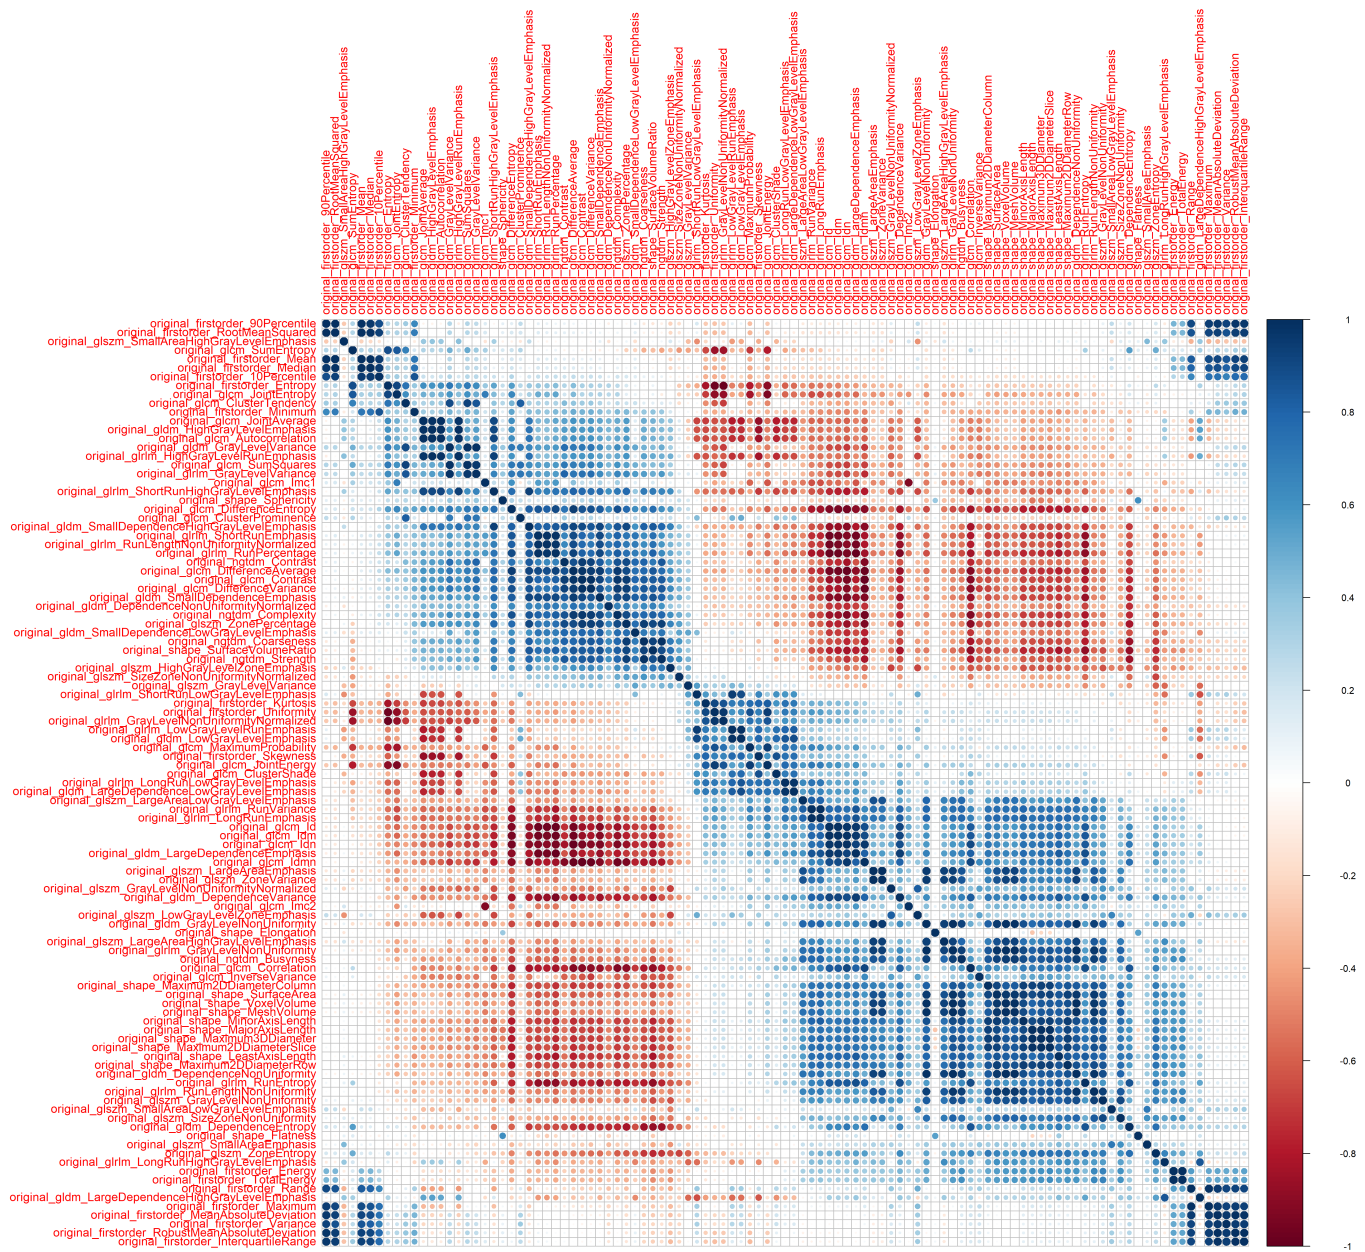

SF 2. Correlation between radiomic features.

# original\_glszm\_SmallAreaLowGrayLevelEmphasis

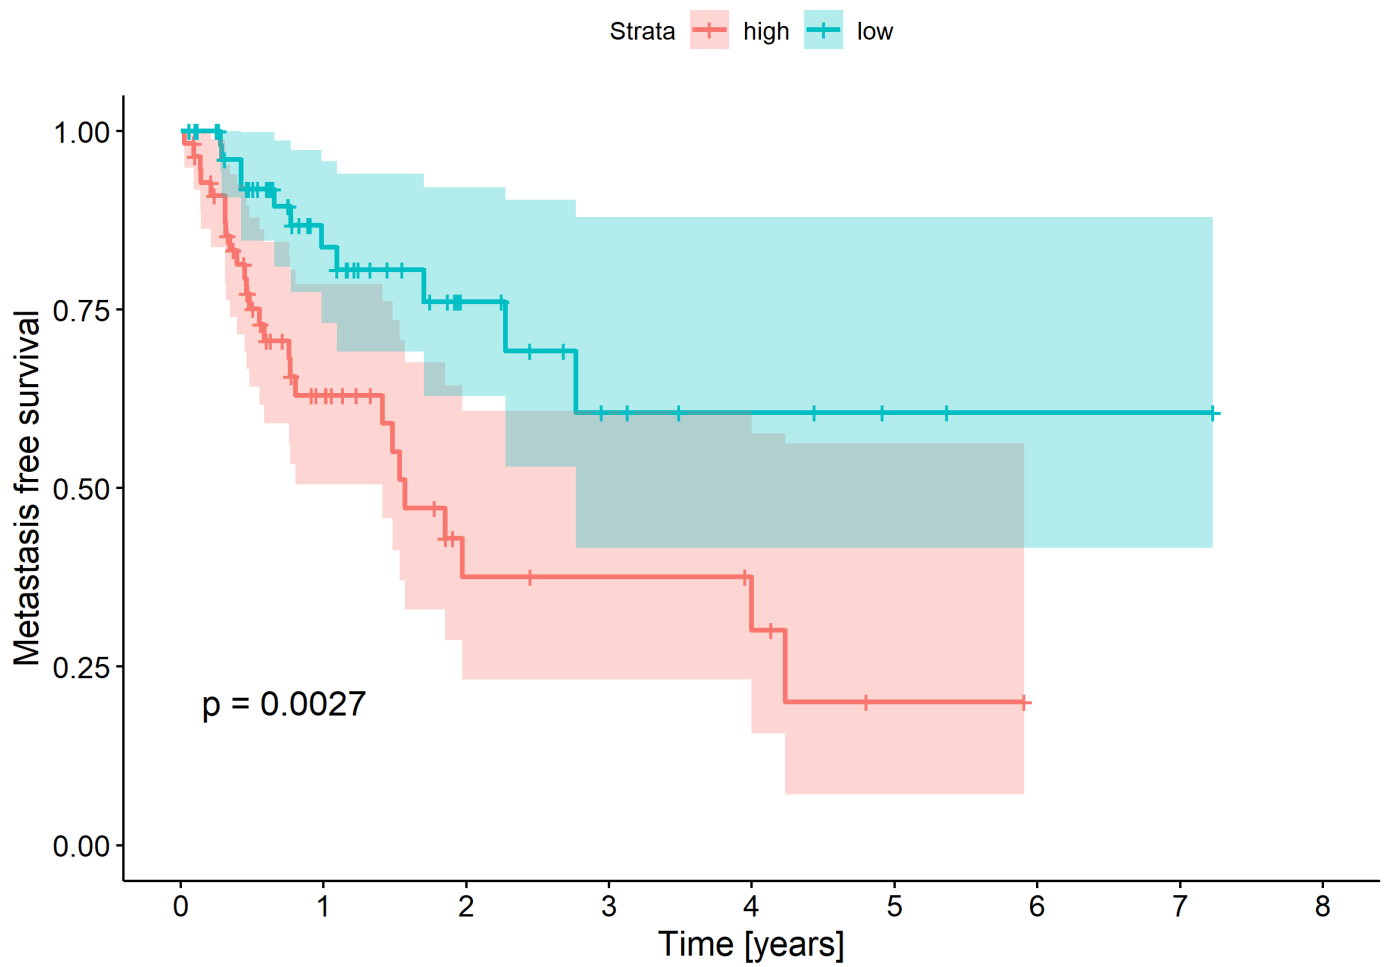

SF 3. Kaplan-Meier plot for metastatic-free survival with high/low SmallAreaLowGrayLevelEmphasis value

# original\_glrIm\_RunLengthNonUniformity

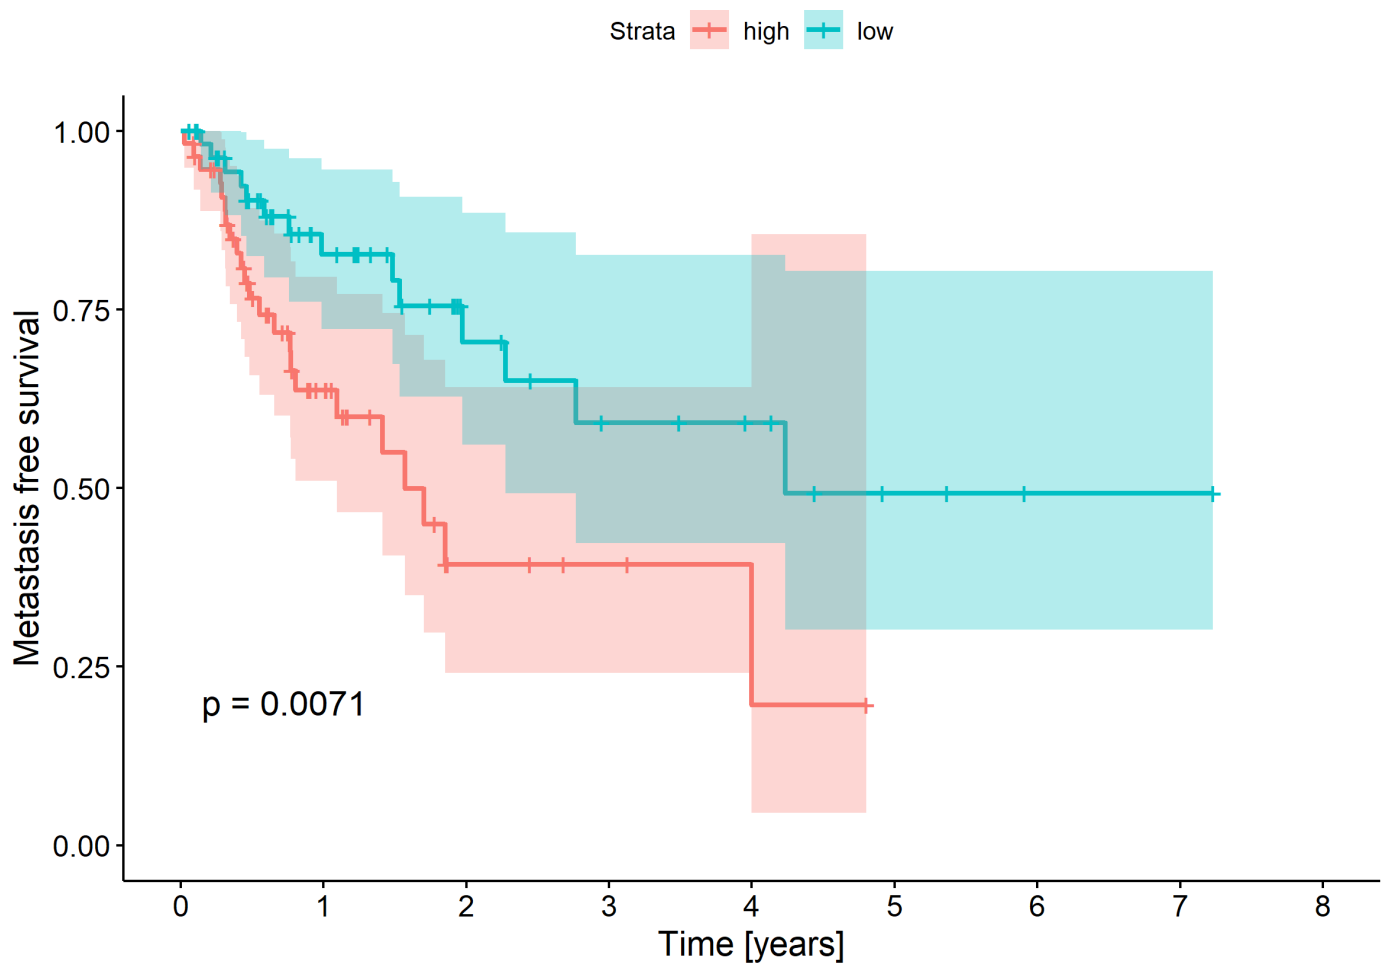

SF 4. Kaplan-Meier plot for metastatic-free survival with high/low RunLengthNonUniformity value
